# Supplementary material
Source: HighWire-hosted journal article supplement (https://bmjopen.bmj.com/content/9/10/e033183)
Supplement: inline-supplementary-material-2 [file inline-supplementary-material-2.pdf]

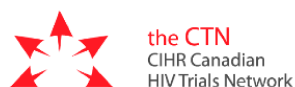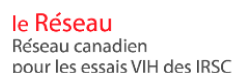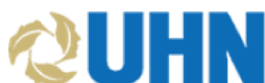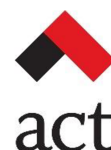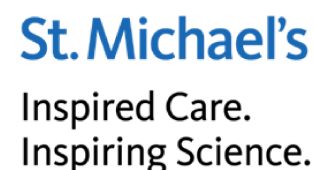

## PARTICIPANT INFORMATION AND CONSENT FORM

|                                             |                                                                                                                                                                                                                                                                                                         |
|---------------------------------------------|---------------------------------------------------------------------------------------------------------------------------------------------------------------------------------------------------------------------------------------------------------------------------------------------------------|
| <b>Study Title:</b>                         | IN HAND - Cognitive remediation group therapy to improve older adults' ability to cope with HIV-Associated Neurocognitive Disorder (HAND): A pilot randomized, controlled trial                                                                                                                         |
| <b>Protocol Number:</b>                     | CTNPT 029                                                                                                                                                                                                                                                                                               |
| <b>Principal Investigator:</b>              | Mr. Andrew D. Eaton, MSW, RSW<br>PhD Candidate & Research Director<br>Factor-Inwentash Faculty of Social Work, University of Toronto<br>416-978-8895 (Monday to Friday 9am-5pm)                                                                                                                         |
| <b>St. Michael's Hospital Investigator:</b> | Dr. Sean B. Rourke, MD, PhD, FCAHS<br>Clinical Neuropsychologist, St. Michael's Hospital<br>Scientist, Li Ka Shing Knowledge Institute<br>Professor of Psychiatry, University of Toronto<br>416-878-2779 (Monday to Friday 9am-5pm)                                                                     |
| <b>Co-Investigator(s):</b>                  | Dr. Sharon L. Walmsley,<br>Toronto General Research Institute (TGRI)<br>University, Health Network (UHN)<br><br>Dr. Shelley L. Craig,<br>Factor-Inwentash Faculty of Social Work, University of Toronto<br><br>Dr. Barbara A. Fallon,<br>Factor-Inwentash Faculty of Social Work, University of Toronto |
| <b>Study Sponsor:</b>                       | St. Michael's Hospital                                                                                                                                                                                                                                                                                  |
| <b>Study Funder:</b>                        | CIHR Canadian HIV Trials Network (CTN)                                                                                                                                                                                                                                                                  |
| <b>Study Coordinator:</b>                   | Mr. Alex Wells<br>AIDS Committee of Toronto (ACT)<br>416-340-8484 ext. 283 (Monday to Friday 9am-5pm)                                                                                                                                                                                                   |
| <b>24-HOUR CONTACT:</b>                     | (416) 864-5431 (Hospital Locating)                                                                                                                                                                                                                                                                      |

## INTRODUCTION

You are being asked to take part in a research study involving group therapy because you are living with HIV-Associated Neurological Disorder (HAND), more specifically, Mild Neurocognitive Disorder (MND).

Before deciding to take part in this study, it is important that you read and understand the following explanation about the study and its risks and benefits. Participation is voluntary. Please ask the study investigator or study staff to explain any words you don't understand. If you have any questions please ask a study investigator or study staff for more information. If you wish to take part in this study, you will be asked to sign this form.

If the study doctor is also your treating doctor, this will be discussed with you.

Please take time to read the following information carefully and if you wish discuss it with your family, friends, and doctor before you decide.

## BACKGROUND

Approximately half of the aging HIV-positive population will be affected by HAND. People with HAND can experience memory impairment and issues with processing new information, problem solving and decision making. With the development, access to, and early initiation of modern antiretroviral therapy (ART), HAND is less severe and less common than it once was. However, people who were treated with old therapies, ones that were less effective and with higher rates of toxicity compared to current regimens, or who experienced AIDS defining illnesses, may be affected by HAND more frequently and more severely.

In the general aging population Mindfulness-Based Stress Reduction (MBSR) and brain training activities (BTA) have been shown to decrease stress and depression and improve coping and quality of life. Mindfulness-Based Stress Reduction (MBSR) involves meditation and breathing exercises. Brain training activities (BTA) involve practice with games on computers and mobile devices that are designed to help improve memory, attention, and organizational skills. These types of therapies can vary widely they have not been fully tested in people aging with HAND.

In this study we will explore the use of cognitive remediation group therapy (CRGT) in aging HIV-positive adults affected by Mild Neurocognitive Disorder. CRGT will combine Mindfulness-Based Stress Reduction (MBSR) and brain training activities (BTA) in a group setting.

## PURPOSE OF THE STUDY

The purpose of this research study is to determine if it is possible to conduct cognitive remediation group therapy (CRGT) in older HIV-positive adults living with mild-to-moderate HAND and if this type of therapy is acceptable. Researchers will compare this experimental group therapy to the standard of care group therapy that is available to persons living with HIV. As part of the study researchers will also evaluate if there are any changes in your stress, anxiety, and coping from the beginning to the end of the research study.

If you agree to take part in this study you will be one of approximately 16 participants recruited from St. Michael's Hospital.

## WHO CAN TAKE PART IN THE STUDY

*You may be able to participate in this study if:*

- You are aged 40 or older

- You have received a documented HAND diagnosis of MND
- You have been living with HIV for 5 or more years
- You provided consent to St. Michael's Hospital to be contacted for future research studies
- You are available to attend 10 weeks of group therapy in downtown Toronto

*You will not be eligible to participate in this study if:*

- You have been diagnosed with another significant psychiatric condition (i.e. schizophrenia, bipolar disorder, etc.) and/or past traumatic brain injury
- You have a documented HAND diagnosis of asymptomatic neurocognitive impairment (ANI) or HIV-associated dementia (HAD)
- You have active intravenous or crystal meth drug use
- You have been hospitalized within the past month
- You are unable to communicate in English
- You are unable to use a tablet
- You are currently participating in another HAND, or mindfulness treatment study

## DESIGN OF THE STUDY

If you are eligible to take part in this study you will be randomized, which means you will be selected by chance (like a flip of a coin) to one of two therapy groups described below. The randomization for this study is in a 1:1 ratio, which means you will have an equal chance of being in either group. There will be approximately 8 participants in each group.

Participants in each group will be asked to attend 10 weekly 3-hour group therapy sessions:

### **Group A: (Experimental Cognitive remediation group therapy)**

If you are assigned to Group A your group therapy sessions will be led by a Mindfulness-Based Stress Reduction (MBSR)-certified social worker and a peer (person aging with HIV) at Toronto General Hospital. For about one hour you will complete brain training exercises on a tablet using PositScience software by BrainHQ. Study participants will support each other working through these activities. For about two hours you will take part in mindfulness-based stress reduction activities such as meditation and breathing exercises. This type of therapy is research and is not the standard of care for persons living with HIV-Associated Neurological Disorder (HAND).

### **Group B: (Active Control-Living with HIV Support Group Therapy)**

If you are assigned to Group B your therapy sessions will be led by a certified social worker at the AIDS Committee of Toronto (ACT). This group involves peer-based discussion on the effects of living with HIV, with topics determined by the group in the meeting. This is the standard care therapy for persons living with HIV.

## DURATION OF THE STUDY

The total length of your participation in the study will be about 6 months. There will be a screening period (to confirm your eligibility to take part in this study) which may last 1 to 2 weeks. Once you are confirmed to be eligible to take part in this study you will attend a baseline visit to complete a study questionnaire. After all the participants in the study have been enrolled you will be randomized to one of the two therapy groups and you will be asked to meet with the group facilitator and then attend 10 therapy sessions once a week for 10 weeks. At the end of the therapy sessions you will visit the study center for follow-up at about one week after the therapy sessions end and again about 3 months later.

## STUDY PROCEDURES

### Screening Visit (30 minutes)

Once you have agreed to take part in the study and signed the informed consent form study staff will ask you about:

- Your demographic information, medical history and alcohol/drug use
- Any changes in your cognition (memory, problem solving, coping) since your last clinic visit
- Your preferred schedule to attend a 10-week group therapy program
- Your access to a mobile device (i.e., smartphone, tablet) for the purpose of using brain training games from PositScience by BrainHQ.

After the screening visit study staff will access your patient chart at St. Michaels Hospital to collect information about your medical history, medications and clinic visits to see if you meet the specific requirements to be in the study. Your demographics (age, ethnicity, gender etc.) will also be collected from your patient chart.

If you meet the study entry criteria you will be asked to visit the study center for a baseline visit.

### Baseline Visit (40 minutes)

At this visit you will be asked to complete a study questionnaire that asks about your emotions and thoughts surrounding living with HIV and HAND. This survey will be completed on a computer but if you prefer you can complete it on paper. Study staff will be available to help you with any questions you do not understand.

### Group Assignment (Randomization)

Once all the study participants have been enrolled in the study you will be randomly assigned to one of the two therapy groups:

**Group A:** Experimental Cognitive Remediation Group Therapy **or**

**Group B:** Active Control-Living with HIV Support Group Therapy (standard of care group therapy)

### Facilitator Meeting (20 minutes)

After you have been assigned to a group you will be asked to meet with your group facilitator before the therapy sessions begins. The facilitator will give you more information on what to expect at the therapy sessions.

### Therapy Sessions (Visit 1-10, 3 hours each)

You will be asked to attend 10 group therapy sessions for 10 weeks in a row. Each session will last about 3 hours. This is a total of 30 hours of group therapy.

### Visit 5 and 10 Questionnaires (10 minutes each)

At the end of therapy sessions 5 and 10 you will also be asked to complete a questionnaire about your satisfaction with the session's length, content and facilitators. This will be completed on paper.

### Follow-up Visit (40 minutes)

You will be asked to visit the study center 1-2 weeks after the group therapy sessions have ended. At this visit you will be asked to complete a study questionnaire that asks about your emotions and thoughts surrounding living with HIV and HAND. This is the same questionnaire that you completed at the baseline visit. This survey will be completed on a computer but if you prefer you can complete it on paper. Study staff will be available to help explain any questions you do not understand. This visit will take about 40 minutes to complete.

**End of Study Visit (40 minutes)**

You will be asked to visit the study center about 3 months after the follow-up visit. At this visit you will be asked to complete a study questionnaire that asks about your emotions and thoughts surrounding living with HIV and HAND. This is the same questionnaire that you completed at the baseline and follow-up visits. This survey will be completed on a computer but if you prefer you can complete it on paper. Study staff will be available to help explain any questions you do not understand.

After this, you will have finished all of the study visits and your participation in the study will be completed.

**POTENTIAL HARMS AND DISCOMFORTS**

We do not think you will be harmed in any way during this study, but there is a chance that you could find some parts of the study uncomfortable.

- You may feel anxious, upset or sad when answering questions or completing questionnaires. You are not required to answer any questions that make you feel uncomfortable.
- During the group therapy you will be asked some personal questions about your experiences with HIV and HAND. We need to ask these questions for the study to understand the impact of the program, and what could be done better in the future. This may make you experience discomfort, anxiety, and/or unease from disclosing sensitive information about yourself to other participants during the group therapy.

***If you have any concerns about your feelings during the study please contact the study team and they can direct you to the appropriate support service. You can also follow-up with your social worker or other health care professional.***

There is potential for research participants/group members to expose sensitive information about the group and/or other group members. Research participants/group members will be asked during the consent process and throughout the group therapy sessions to maintain the confidentiality of the group, however group members are not bound by professional obligations to maintain the confidentiality of the group. Facilitators are bound by professional obligations to maintain the confidentiality of the group. Research participants/group members will be advised to practice some caution before sharing personal and sensitive information. All participants will only be referred to by a first name, and will be offered the possibility of using a pseudonym (false name) in the group.

**POTENTIAL BENEFITS**

We do not know whether being in this study will benefit you. It is possible that you may learn new skills that may help you cope with HAND but this is not certain.

This is a “pilot study” which is done to test the study plan and to find out whether enough participants will join a larger study and accept the study procedures. The results may be used as a guide for larger studies, although there is no guarantee that they will be conducted. Knowledge gained from pilot studies may be used to develop future studies that may benefit others.

**ALTERNATIVES TO PARTICIPATION**

You do not have to join this study to receive services related to HAND. If you decide not to take part in this study you will still be able to receive any standard of care treatment you are already receiving, or are due to receive.

### **VOLUNTARY PARTICIPATION AND WITHDRAWAL**

Your participation in this study is voluntary. You may withdraw from this study at any time without giving reasons. Your decision will not affect your or your family's ability to receive medical care at St. Michael's Hospital or any of the other study sites, and you will not lose any benefits to which you are otherwise entitled.

The study investigator may also stop your participation in the study without your consent if it is in your best interest or if you do not follow the requirements of the study. If you are asked to leave the study, the reasons for this will be explained to you and you will have the opportunity to ask questions about this decision.

The data you provide up to the point of withdrawal may still be used in the analysis. No further information will be collected from you.

### **NEW INFORMATION**

If any new information becomes available during the study that could affect your willingness to continue to participate, it will be supplied to you.

### **COSTS TO PARTICIPATION AND COMPENSATION**

There will be no cost to you for taking part in this study. You will not be paid for your participation in this study. However, you will be provided with a maximum of \$300 in compensation for your time and travel. Compensation will be provided according to the following schedule:

- \$20 for attending the Screening Visit
- \$20 for attending the Baseline Visit
- \$20 for attending the Facilitator Meeting
- \$20 for attending each therapy session (10 sessions x \$20 = \$200)
- \$20 for completing the Follow-up Visit
- \$20 for completing the End of Study Visit

### **RIGHTS AS A PARTICIPANT**

If you are harmed as a result of taking part in this study, all necessary medical treatment will be made available to you at no cost.

By signing this form you do not give up any of your legal rights against the investigators, sponsor or involved institutions for compensation, nor does this form relieve the investigators, sponsor or involved institutions of their legal and professional responsibilities.

## PROTECTING YOUR HEALTH INFORMATION: PRIVACY AND CONFIDENTIALITY

If you agree to join this study, the study investigator and his/her study team will look at your personal health information and collect only the information they need for the study. Personal health information is any information that could be used to identify you and includes your

- Name and age
- Address
- Hospital ID,
- Date of birth,
- New or Existing medical records, including types, dates and results of medical tests or procedures

All persons involved in the study, including the study investigators, coordinators, nurses and delegates (hereby referred to as “study personnel”), are committed to respecting your privacy. No other persons will have access to your personal health information or identifying information without your consent, unless required by law. The study personnel and the study sponsor will make every effort to keep your personal health information private and confidential in accordance with all applicable privacy legislations, including the Personal Health Information Protection Act (PHIPA) of Ontario.

The following groups or people may come to look at the study records and at your personal health information to check that the information collected for the study is correct and to make sure the study followed proper laws and guidelines:

- University Health Network (the study sponsor) or its representative
- Representatives of St Michaels Hospital and University Health Network Research Ethics Boards

Any personal identifying information (such as your name) will be “de-identified” by replacing your personal identifying information with a “study number”. This number will be used on any research-related information collected about you during the course of this study, so that your identity will be kept confidential. Information that contains your identity will be available to St. Michael’s Hospital investigator Dr. Sean Rourke and the study staff. The list that matches your name to the unique study number that is used on your research-related information will not be removed or released without your consent unless required by law.

Your coded study data will be sent to and accessed by study personnel at the AIDS Committee of Toronto (ACT), University Health Network (UHN), and the CIHR Canadian HIV Trials Network (CTN). This data will not include your name or address, date of birth or any information that directly identifies you. To protect your privacy, data will be password protected and access to study data will be limited to authorized persons and transmission of the data will be encrypted.

The data collected for this study will not be part of your medical record, however your participation in this study may be recorded in your medical record. You have the right to review your personal data and request changes if not correct. However, access to your study data during the study may be limited if it weakens the integrity of the study.

All study data will be kept in a locked and secure area by the study investigator. Electronic files will be stored securely on the hospital network. Study data will be kept for 7 years after the end of the study at which time paper study documents will be shredded and electronic data will be destroyed.

## STUDY REGISTRATION AND RESULTS

A description of this clinical trial will be available on <http://www.hivnet.ubc.ca/clinical-trials/ctnpt-029/>, as required. This website will not include information that can identify you. At most, the Website will include a summary of the results. You can search this Website at any time.

The study results may be published in medical literature or presented at conferences, seminars or other public forums, but you will not be identified by name or any other identifying information.

## COMMUNICATION WITH YOUR FAMILY DOCTOR OR SPECIALIST

If you consent, we will be informing your primary treating doctor and/or specialist of your study participation. We will send your primary physician and/or specialist a letter which will include a brief summary of the study so they can provide proper medical care.

## RESEARCH ETHICS BOARD CONTACT

If you have questions regarding your rights as a research participant, you may contact the Director, Sharon Freitag, Research Ethics, St. Michael's Hospital, at 416-864-6060 ext. 2385 during business hours.

This research project and information and consent form have been reviewed and approved by the Research Ethics Board (REB) at St. Michael's Hospital. The REB is a group of scientists, medical staff, individuals from other backgrounds (including law and ethics), as well as members from the community. The committee is established by the hospital to review studies for their scientific and ethical merit. The Board pays special attention to the potential harms and benefits involved in participation to the research participant, as well as the potential benefit to society. This group is also required to do periodic review on ongoing research studies. As part of this review, someone may contact you from the REB to discuss your experience in the research study.

## STUDY CONTACTS AND EMERGENCY CONTACT

If you have any questions about this study at any time, or if you experience a research-related injury, you should contact:

Principal Investigator: Mr. Andrew Eaton  
416-978-8895 / [andrew.eaton@utoronto.ca](mailto:andrew.eaton@utoronto.ca)

St. Michael's Investigator: Dr. Sean Rourke  
416-878-2779 / [sean.rourke@utoronto.ca](mailto:sean.rourke@utoronto.ca)

Research Coordinator: Mr. Alex Wells  
416-340-8484, ext. 283 / [awells@utoronto.ca](mailto:awells@utoronto.ca)



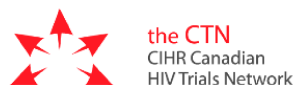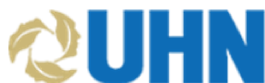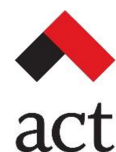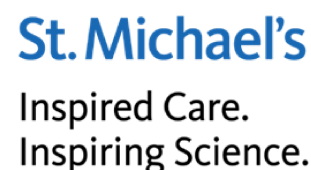

## STATEMENT OF CONSENT

**Study Title:** IN HAND - Cognitive remediation group therapy to improve older adults' ability to cope with HIV-Associated Neurocognitive Disorder (HAND): A pilot randomized, controlled trial

This research study has been explained to me, and my questions have been answered to my satisfaction. I have been informed of the alternatives to participation in this study. I have the right not to participate and the right to withdraw without affecting the quality of medical care at St. Michael's Hospital for me and for other members of my family. As well, the potential harms and benefits (if any) of participating in this research study have been explained to me.

I have been told that I have not waived my legal rights nor released the study investigators, study sponsor, or involved institutions from their legal and professional responsibilities. I know that I may ask now, or in the future, any questions I have about the study. I have been told that records relating to me and my care will be kept confidential and that no information will be disclosed without my permission unless required by law. I have been given sufficient time to read the above information.

**Consent to notify primary care physician (s) or specialist(s) of your participation in this study** This is not a consent to release medical information.

Initial: \_\_\_\_\_ Yes, I want the study investigator to advise my primary care physician(s) or specialist(s) of my participation in this study.

Initial: \_\_\_\_\_ No, I do not want the study investigator to advise my primary care physician(s) or specialist(s) of my participation in this study.

### Consent to participate in the study

I hereby consent to participate in this study. I have been told I will be given a copy of this signed consent form.

\_\_\_\_\_  
Participant's Name (Print)

\_\_\_\_\_  
Participant's Signature

\_\_\_\_\_  
Date [MM/DD/YYYY]

I have explained the study to the above-named participant. I have explained the nature and purpose, the potential benefits, and possible risks associated with participation in this research study. I have answered all questions that have been raised about the study.

\_\_\_\_\_  
Name and Position of Person  
Obtaining Consent (Print)

\_\_\_\_\_  
Signature of Person Obtaining  
Consent

\_\_\_\_\_  
Date [MM/DD/YYYY]

**APPENDIX A (Study Visit Schedule)**

| <b>Visit Details</b>                                                                           | <b>Screening Period</b> |                 |                | <b>Study Period</b> |              |                | <b>Follow-up Period</b> |                    |
|------------------------------------------------------------------------------------------------|-------------------------|-----------------|----------------|---------------------|--------------|----------------|-------------------------|--------------------|
| Visit Name                                                                                     | Screening Call          | Screening Visit | Baseline Visit | Orientation         | Sessions 1-7 | Sessions 4 & 8 | Follow-up Visit         | End of Study Visit |
| Visit #                                                                                        | -3                      | -3              | -1             | 0                   | 1,2,3,4,6,7  | 4 & 8          | 9                       | 10                 |
| Week #                                                                                         |                         |                 | -1             | 0-8                 |              |                | 9                       | 21                 |
| Day #                                                                                          | -56 to -7 days          |                 | -7             | 0-56                |              |                | 63                      | 153                |
| Day Window                                                                                     | +/- 7                   | +/- 7           | +/- 7          | +/- 7               | +/- 0        | +/- 0          | +/- 7                   | +/- 7              |
| <b>Procedures</b>                                                                              |                         |                 |                |                     |              |                |                         |                    |
| Informed Consent                                                                               |                         | X               |                |                     |              |                |                         |                    |
| Entry Criteria Assessment                                                                      | X                       | X               |                |                     |              |                |                         |                    |
| Chart Abstraction (demographics)                                                               |                         | X               |                |                     |              |                |                         |                    |
| Randomization                                                                                  |                         |                 | X <sup>1</sup> |                     |              |                |                         |                    |
| Group Sessions                                                                                 |                         |                 |                | X <sup>2</sup>      | X            | X              |                         |                    |
| Facilitator Session Reports                                                                    |                         |                 |                |                     | X            | X              |                         |                    |
| Helping Characteristics of Self-Help and Support Groups Measure                                |                         |                 |                |                     |              | X              |                         |                    |
| HIV/AIDS Stress Scale                                                                          |                         |                 | X              |                     |              |                | X                       | X                  |
| Anxiety in Cognitive Impairment and Dementia Scale                                             |                         |                 | X              |                     |              |                | X                       | X                  |
| Coping Self-efficacy of Health Problems Scale                                                  |                         |                 | X              |                     |              |                | X                       | X                  |
| Five Facet Mindfulness Questionnaire – Short Form                                              |                         |                 | X              |                     |              |                | X                       | X                  |
| <sup>1</sup> To occur once all participants have been enrolled and eligibility confirmed       |                         |                 |                |                     |              |                |                         |                    |
| <sup>2</sup> Acquaintance with group only; no therapy will be administered during this session |                         |                 |                |                     |              |                |                         |                    |

IN HAND – Screening Visit Script

ID: \_\_\_\_\_ Date: \_\_\_\_\_

**Inclusion/Exclusion Criteria Confirmation**

| Inclusion Criteria                                                      | Yes                      | No                       | Exclusion Criteria                                  | Yes                      | No                       |
|-------------------------------------------------------------------------|--------------------------|--------------------------|-----------------------------------------------------|--------------------------|--------------------------|
| 1) Participant Age $\geq 40$                                            | <input type="checkbox"/> | <input type="checkbox"/> | 1) ANI / HAD diagnosis                              | <input type="checkbox"/> | <input type="checkbox"/> |
| 2) $\geq 5$ years living with HIV                                       | <input type="checkbox"/> | <input type="checkbox"/> | 2) Hospitalization within past 30 days              | <input type="checkbox"/> | <input type="checkbox"/> |
| 3) MND (Mild Neurocognitive Disorder) diagnosis                         | <input type="checkbox"/> | <input type="checkbox"/> | 3) Inability to communicate in English              | <input type="checkbox"/> | <input type="checkbox"/> |
| 4) Consented to future contact for research from St. Michael's Hospital | <input type="checkbox"/> | <input type="checkbox"/> | 4) Cannot use a tablet                              | <input type="checkbox"/> | <input type="checkbox"/> |
| 5) Can attend 8 weeks of group therapy in downtown Toronto              | <input type="checkbox"/> | <input type="checkbox"/> | 5) Would be disruptive to a group setting           | <input type="checkbox"/> | <input type="checkbox"/> |
| If # <b>No</b> $\geq 1$ , cannot enroll into study                      | <input type="checkbox"/> | <input type="checkbox"/> | If # <b>Yes</b> $\geq 1$ , cannot enroll into study | <input type="checkbox"/> | <input type="checkbox"/> |

If participant does not meet Inclusion/Exclusion Criteria, Please specify #: \_\_\_\_\_

If **OTHER** Please specify \_\_\_\_\_ If eligible, proceed with ICF Process. After ICF is signed, continue to 3.

**2. Participant Availability (Mark when typically available)****May-June 2018**

| Sunday             | Monday             | Tuesday            | Wednesday          | Thursday           | Friday             | Saturday           |
|--------------------|--------------------|--------------------|--------------------|--------------------|--------------------|--------------------|
| 9:00 AM – 12:00 PM | 9:00 AM – 12:00 PM | 9:00 AM – 12:00 PM | 9:00 AM – 12:00 PM | 9:00 AM – 12:00 PM | 9:00 AM – 12:00 PM | 9:00 AM – 12:00 PM |
| 12:00 PM – 3:00 PM | 12:00 PM – 3:00 PM | 12:00 PM – 3:00 PM | 12:00 PM – 3:00 PM | 12:00 PM – 3:00 PM | 12:00 PM – 3:00 PM | 12:00 PM – 3:00 PM |
| 3:00 PM – 6:00 PM  | 3:00 PM – 6:00 PM  | 3:00 PM – 6:00 PM  | 3:00 PM – 6:00 PM  | 3:00 PM – 6:00 PM  | 3:00 PM – 6:00 PM  | 3:00 PM – 6:00 PM  |
| 6:00 PM – 9:00 PM  | 6:00 PM – 9:00 PM  | 6:00 PM – 9:00 PM  | 6:00 PM – 9:00 PM  | 6:00 PM – 9:00 PM  | 6:00 PM – 9:00 PM  | 6:00 PM – 9:00 PM  |

**Fall 2018 (August-December)**

| Sunday             | Monday             | Tuesday            | Wednesday          | Thursday           | Friday             | Saturday           |
|--------------------|--------------------|--------------------|--------------------|--------------------|--------------------|--------------------|
| 9:00 AM – 12:00 PM | 9:00 AM – 12:00 PM | 9:00 AM – 12:00 PM | 9:00 AM – 12:00 PM | 9:00 AM – 12:00 PM | 9:00 AM – 12:00 PM | 9:00 AM – 12:00 PM |
| 12:00 PM – 3:00 PM | 12:00 PM – 3:00 PM | 12:00 PM – 3:00 PM | 12:00 PM – 3:00 PM | 12:00 PM – 3:00 PM | 12:00 PM – 3:00 PM | 12:00 PM – 3:00 PM |
| 3:00 PM – 6:00 PM  | 3:00 PM – 6:00 PM  | 3:00 PM – 6:00 PM  | 3:00 PM – 6:00 PM  | 3:00 PM – 6:00 PM  | 3:00 PM – 6:00 PM  | 3:00 PM – 6:00 PM  |
| 6:00 PM – 9:00 PM  | 6:00 PM – 9:00 PM  | 6:00 PM – 9:00 PM  | 6:00 PM – 9:00 PM  | 6:00 PM – 9:00 PM  | 6:00 PM – 9:00 PM  | 6:00 PM – 9:00 PM  |

Times unavailable in Spring or Fall: \_\_\_\_\_

IN HAND – Screening Visit Script

ID: \_\_\_\_\_ Date:\_\_\_\_\_

4. **Mobile Device Access**

Do you have access to the following mobile devices?

|            |     |    |
|------------|-----|----|
| Computer   | Yes | No |
| Tablet     | Yes | No |
| Smartphone | Yes | No |

IN HAND – Baseline Questionnaire

ID: \_\_\_\_\_ Date: \_\_\_\_\_

IN HAND

Cognitive remediation group therapy to improve older adults’ ability to cope with HIV-Associated Neurocognitive Disorder (HAND):  
A pilot randomized, controlled trial

**Questionnaire: Baseline Visit, Post-Intervention, 3-month Follow-up**

**Participant ID:** \_\_\_\_\_ **Date:** \_\_\_\_\_

Hi there, I’m a study coordinator with the IN HAND research study. I have some questions about your emotions and thoughts surrounding HIV and HAND- your experiences with stress, anxiety, and coping. I’m going to ask you some survey-like questions, some yes or no, some on a scale of 0-4, and some on a scale from 1-5. You can choose not to answer any question, and we can pause, or stop the questionnaire at any time you like.

Would you like to begin?

**HIV/AIDS Stress Scale**

Below is a list of problems that people living with HIV sometimes have. For each question, there are two examples to describe the problem. Your own examples may differ from the ones provided, so long as they seem to fit within the problem category. Please circle a number to the right of each question that best describes how troublesome that problem has been for you during the past month.

| How much were you troubled by:                                                                                                                                                                 | Not at all | A bit<br>(once or twice in the past month) | Moderate<br>(once or twice a week for the past month) | A lot<br>(three to six times a week for the past month) | Extreme<br>(daily) |
|------------------------------------------------------------------------------------------------------------------------------------------------------------------------------------------------|------------|--------------------------------------------|-------------------------------------------------------|---------------------------------------------------------|--------------------|
| 1. <b>Distressing emotions related to HIV</b> (e.g., you feel angry or fearful; you feel anxious or depressed)                                                                                 | 0          | 1                                          | 2                                                     | 3                                                       | 4                  |
| 2. <b>Relationship difficulties related to HIV</b> (e.g., you have arguments with your support person about how to best care for your health; you have difficulty establishing a relationship) | 0          | 1                                          | 2                                                     | 3                                                       | 4                  |
| 3. <b>Grief/bereavement related to HIV</b> (e.g., you are concerned about your own losses such as loss of independence; you are grieving for the loss of a loved one from AIDS)                | 0          | 1                                          | 2                                                     | 3                                                       | 4                  |

IN HAND – Baseline Questionnaire

ID: \_\_\_\_\_ Date: \_\_\_\_\_

|                                                                                                                                                                                                            |   |   |   |   |   |
|------------------------------------------------------------------------------------------------------------------------------------------------------------------------------------------------------------|---|---|---|---|---|
| <b>4. Confidentiality/privacy concerns related to HIV</b> (e.g., you are concerned about your HIV status breached; you are reluctant to disclose your status to others)                                    | 0 | 1 | 2 | 3 | 4 |
| <b>5. Sexual difficulties related to HIV</b> (e.g., you're finding it hard to maintain safe sex behaviours; you are sexually frustrated)                                                                   | 0 | 1 | 2 | 3 | 4 |
| <b>6. Difficulties in coming to terms with your HIV status</b><br>(e.g., you can't accept that you have HIV; you refuse to even think about HIV)                                                           | 0 | 1 | 2 | 3 | 4 |
| <b>7. Concerns about death related to HIV</b> (e.g., you are preoccupied with dying; you don't think about the possibility that you may die from HIV)                                                      | 0 | 1 | 2 | 3 | 4 |
| <b>8. Isolation related to HIV</b> (e.g., you have less contact with others because of HIV; you don't get invited out much now that you have HIV)                                                          | 0 | 1 | 2 | 3 | 4 |
| <b>9. Suicidal thoughts/attempts related to HIV</b><br>(e.g., you have thoughts of ending your life; you have actually attempted to end your life)                                                         | 0 | 1 | 2 | 3 | 4 |
| <b>10. Increased drug/alcohol intake related to HIV</b> (e.g., you use drugs and/or alcohol more now; you are often high or drunk)                                                                         | 0 | 1 | 2 | 3 | 4 |
| <b>11. Discrimination/stigma concerns related to HIV</b> (e.g., you are concerned that you will be discriminated against because of HIV; you feel as if you have not been treated with respect)            | 0 | 1 | 2 | 3 | 4 |
| <b>12. Religious/existential difficulties related to HIV</b> (e.g., you are having difficulty searching for meaning in your life; you are struggling to make sense of the predicament you are in)          | 0 | 1 | 2 | 3 | 4 |
| <b>13. Overly attentive to bodily functions or changes</b> (e.g., you are constantly checking for HIV-related symptoms; you are overly attentive to any new physical changes such as appearance of a rash) | 0 | 1 | 2 | 3 | 4 |
| <b>14. Difficulties in telling others of your HIV status</b> (e.g., you don't know who, how, or when to tell of your HIV status; you have only told one or two people)                                     | 0 | 1 | 2 | 3 | 4 |
| <b>15. Boredom related to HIV</b> (e.g., you are unable to use your free time doing things you would normally enjoy; you often find yourself sitting about doing nothing)                                  | 0 | 1 | 2 | 3 | 4 |

---

 Protocol CTNPT 029 Baseline Questionnaire  
 Version Date: Version 3.0 - 7-Mar-2018

IN HAND – Baseline Questionnaire

ID: \_\_\_\_\_ Date: \_\_\_\_\_

|                                                                                                                                                                                             |   |   |   |   |   |
|---------------------------------------------------------------------------------------------------------------------------------------------------------------------------------------------|---|---|---|---|---|
| 16. <b>Difficulty dealing with HIV-related symptoms of illness</b> (e.g., you often have difficulty dealing with fatigue or nausea; you have pain and physical discomfort most of the time) | 0 | 1 | 2 | 3 | 4 |
| 17. <b>Difficulty in enhancing your health</b> (e.g., your attempts to maintain adequate nutrition, or a positive mental attitude often are short-lived)                                    | 0 | 1 | 2 | 3 | 4 |
| 18. <b>Difficulty with health care system</b> (e.g., you have difficulties in getting access to health services such as dentists or home care)                                              | 0 | 1 | 2 | 3 | 4 |
| 19. <b>Difficulties with HIV treatment</b> (e.g., you have difficulties managing side effects from HIV treatments; you can't adhere to HIV treatment)                                       | 0 | 1 | 2 | 3 | 4 |
| 20. <b>Transport difficulties related to HIV</b> (e.g., you have difficulty getting appropriate transport to places; public transport is physically demanding)                              | 0 | 1 | 2 | 3 | 4 |
| 21. <b>Financial difficulties related to HIV</b> (e.g., you are unable to pay debts; you have problems with superannuation payouts)                                                         | 0 | 1 | 2 | 3 | 4 |
| 22. <b>Daily living difficulties related to HIV</b> (e.g., you can't always do the shopping or cleaning; you can't keep up with the basic day-to-day chores)                                | 0 | 1 | 2 | 3 | 4 |
| 23. <b>Reducing risk of infection</b> (e.g., you are preoccupied with thoughts about transmitting HIV to others; you are concerned that some of your behaviours may put others at risk)     | 0 | 1 | 2 | 3 | 4 |
| 24. <b>Difficulty in accessing information related to HIV</b> (e.g., you have received conflicting information on HIV; you can't get adequate treatment information)                        | 0 | 1 | 2 | 3 | 4 |
| 25. <b>Employment difficulties related to HIV</b> (e.g., you can't obtain/maintain employment because of illness; you are concerned about work-related stress)                              | 0 | 1 | 2 | 3 | 4 |
| 26. <b>Legal problems related to HIV</b> (e.g., you are involved in a legal process; you don't know who to assign power of attorney to)                                                     | 0 | 1 | 2 | 3 | 4 |
| 27. <b>Planning difficulties related to HIV</b> (e.g., uncertainty with your health makes career planning difficult; you don't know whether to start new projects)                          | 0 | 1 | 2 | 3 | 4 |

---

 Protocol CTNPT 029 Baseline Questionnaire  
 Version Date: Version 3.0 - 7-Mar-2018

IN HAND – Baseline Questionnaire

ID: \_\_\_\_\_ Date: \_\_\_\_\_

|                                                                                                                                                                                                                                             |   |   |   |   |   |
|---------------------------------------------------------------------------------------------------------------------------------------------------------------------------------------------------------------------------------------------|---|---|---|---|---|
| 28. <b>Difficulties with thinking processes related to HIV</b> (e.g., you forget things more than usual; you can't concentrate as well as usual)                                                                                            | 0 | 1 | 2 | 3 | 4 |
| 29. <b>Dealing with declining health related to HIV</b> (e.g., you have difficulty in dealing with increasing physical restrictions due to declining health; you have difficulty dealing with the change from being well to having illness) | 0 | 1 | 2 | 3 | 4 |

**Anxiety in Cognitive Impairment and Dementia Scale**

Please circle yes or no for the following questions, thinking about the past 24 hours. If you answer yes to the numbered questions, please answer the corresponding letter question below it.

In the past 24 hours:

|                                                                                                                     |     |    |
|---------------------------------------------------------------------------------------------------------------------|-----|----|
| 1. Have you experienced worry?<br>(e.g., about health, memory of cognitive functioning, friends and family, etc.)   | yes | no |
| a. If so, did worrying bother you?                                                                                  | yes | no |
| 2. Have you experienced anxiety?<br>(e.g., about health, memory of cognitive functioning, friends and family, etc.) | yes | no |
| a. If so, did the anxiety bother you?                                                                               | yes | no |
| 3. Have you been startled?<br>(e.g., sudden scare, no sense of time and place, etc.)                                | yes | no |
| a. If so, did the startle bother you?                                                                               | yes | no |
| 4. Have you experienced insomnia?<br>(e.g., sleeplessness, etc.)                                                    | yes | no |
| a. If so, did the insomnia bother you?                                                                              | yes | no |
| 5. Have you experienced irritability?<br>(e.g., low patience, expression of frustration, etc.)                      | yes | no |
| a. If so, did the irritability bother you?                                                                          | yes | no |
| 6. Have you experienced muscle tension?                                                                             | yes | no |
| a. If so, did the muscle tension bother you?                                                                        | yes | no |
| 7. Have you experienced restlessness?<br>(e.g., fidgeting, etc.)                                                    | yes | no |
| a. If so, did the fidgeting bother you?                                                                             | yes | no |
| 8. Have you experienced fatigue?<br>(e.g., overly tired, not as much energy as normal etc.)                         | yes | no |
| a. If so, did the fatigue bother you?                                                                               | yes | no |
| 9. Have you experienced cardiovascular issues?<br>(e.g., chest pain, etc.)                                          | yes | no |

Protocol CTNPT 029 Baseline Questionnaire  
Version Date: Version 3.0 - 7-Mar-2018



IN HAND – Baseline Questionnaire

ID: \_\_\_\_\_ Date: \_\_\_\_\_

|                                                                                                                |     |    |
|----------------------------------------------------------------------------------------------------------------|-----|----|
| a. If so, did the cardiovascular issues bother you?                                                            | yes | no |
| 10. Have you experienced respiratory issues?<br>(e.g., shortness of breath, etc.)                              | yes | no |
| a. If so, did the respiratory issues bother you?                                                               | yes | no |
| 11. Have you experienced gastrointestinal issues?<br>(e.g., diarrhea, excessive flatulence, etc.)              | yes | no |
| a. If so, did the gastrointestinal issues bother you?                                                          | yes | no |
| 12. Have you experienced other somatic issues?<br>(e.g., pain, depression, etc.)                               | yes | no |
| a. If so, did the somatic issues bother you?                                                                   | yes | no |
| 13. Have you experienced any avoidance behaviours?<br>(e.g., denial, not wanting to attend appointments, etc.) | yes | no |
| a. If so, did the avoidance behaviour bother you?                                                              | yes | no |

**Five Facet Mindfulness Questionnaire – Short Form FFMQ-SF)**

Below is a collection of statements about your everyday experience. Using the 1–5 scale below, please indicate, in the box to the right of each statement, how frequently or infrequently you have had each experience in the last month (or other agreed time period). Please answer according to what really reflects your experience rather than what you think your experience should be.

| <i>Never or Very<br/>Rarely True</i><br><b>1</b> | <i>Not often true</i><br><b>2</b>                                                         | <i>Sometimes True<br/>Sometimes Not True</i><br><b>3</b> | <i>Often True</i><br><b>4</b> | <i>Very often or<br/>Always True</i><br><b>5</b> |
|--------------------------------------------------|-------------------------------------------------------------------------------------------|----------------------------------------------------------|-------------------------------|--------------------------------------------------|
| 1                                                | I'm good at finding the words to describe my feelings                                     |                                                          |                               | DS                                               |
| 2                                                | I can easily put my beliefs, opinions, and expectations into words                        |                                                          |                               | DS                                               |
| 3                                                | I watch my feelings without getting carried away by them                                  |                                                          |                               | NR                                               |
| 4                                                | I tell myself that I shouldn't be feeling the way I'm feeling                             |                                                          |                               | /NJ                                              |
| 5                                                | it's hard for me to find the words to describe what I'm thinking                          |                                                          |                               | /DS                                              |
| 6                                                | I pay attention to physical experiences,<br>such as the wind in my hair or sun on my face |                                                          |                               | OB                                               |
| 7                                                | I make judgments about whether my thoughts are good or bad.                               |                                                          |                               | /NJ                                              |

Protocol CTNPT 029 Baseline Questionnaire  
Version Date: Version 3.0 - 7-Mar-2018

IN HAND – Baseline Questionnaire

ID: \_\_\_\_\_ Date: \_\_\_\_\_

|    |                                                                                                              |     |  |
|----|--------------------------------------------------------------------------------------------------------------|-----|--|
| 8  | I find it difficult to stay focused on what's happening in the present moment                                | /AA |  |
| 9  | when I have distressing thoughts or images, I don't let myself be carried away by them                       | NR  |  |
| 10 | generally, I pay attention to sounds, such as clocks ticking, birds chirping, or cars passing                | OB  |  |
| 11 | when I feel something in my body, it's hard for me to find the right words to describe it                    | /DS |  |
| 12 | it seems I am "running on automatic" without much awareness of what I'm doing                                | /AA |  |
| 13 | when I have distressing thoughts or images, I feel calm soon after                                           | NR  |  |
| 14 | I tell myself I shouldn't be thinking the way I'm thinking                                                   | /NJ |  |
| 15 | I notice the smells and aromas of things                                                                     | OB  |  |
| 16 | even when I'm feeling terribly upset, I can find a way to put it into words                                  | DS  |  |
| 17 | I rush through activities without being really attentive to them                                             | /AA |  |
| 18 | usually when I have distressing thoughts or images I can just notice them without reacting                   | NR  |  |
| 19 | I think some of my emotions are bad or inappropriate and I shouldn't feel them                               | /NJ |  |
| 20 | I notice visual elements in art or nature, such as colors, shapes, textures, or patterns of light and shadow | OB  |  |
| 21 | when I have distressing thoughts or images, I just notice them and let them go                               | NR  |  |
| 22 | I do jobs or tasks automatically without being aware of what I'm doing                                       | /AA |  |
| 23 | I find myself doing things without paying attention                                                          | /AA |  |
| 24 | I disapprove of myself when I have illogical ideas                                                           | /NJ |  |

Protocol CTNPT 029 Baseline Questionnaire  
Version Date: Version 3.0 - 7-Mar-2018

IN HAND – Baseline Questionnaire

ID: \_\_\_\_\_ Date: \_\_\_\_\_

### Coping Self-Efficacy Scale of Health Problems

Presented below are 10 statements about you and your state of health. Please read each one of them and express if you totally disagree (column marked with 1), disagree (column marked with 2), agree (column marked with 3), or totally agree (column marked with 4). For each question, circle only one answer from the four mentioned. There are no right or wrong answers; what is important is your opinion, so we ask for your honesty.

| Questions                                                                                     | Totally Disagree | Disagree | Agree | Totally Agree |
|-----------------------------------------------------------------------------------------------|------------------|----------|-------|---------------|
| 1. I largely believe that the ability to overcome an illness of disease depends on me         | 1                | 2        | 3     | 4             |
| 2. I am a healthy person, and I do not commonly suffer ailments                               | 1                | 2        | 3     | 4             |
| 3. The majority of people are in worse health than I am                                       | 1                | 2        | 3     | 4             |
| 4. I avoid going to health services and I try to solve my health problems by myself           | 1                | 2        | 3     | 4             |
| 5. I feel optimistic about my state of health                                                 | 1                | 2        | 3     | 4             |
| 6. When faced with a health problem, I first think about how I can solve it for myself        | 1                | 2        | 3     | 4             |
| 7. I think that telling others about one's own health problems does not help to overcome them | 1                | 2        | 3     | 4             |
| 8. I feel happy                                                                               | 1                | 2        | 3     | 4             |
| 9. I believe I have problems in my life, but not as many as others                            | 1                | 2        | 3     | 4             |
| 10. I have many things to worry about, and health is not a main one                           | 1                | 2        | 3     | 4             |

#### Use of Brain Training Activities

Do you currently practice brain training activities on your computer, mobile device, or pen and paper?

Yes    No

1. If yes, how frequently do you practice this activities?
  - ☐ More than 3 hours per week
  - ☐ 1-3 hours per week
  - ☐ Less than 1 hour per week

IN HAND – Group Therapy Satisfaction Questionnaire

ID: \_\_\_\_\_ Date: \_\_\_\_\_

## **Group Therapy Satisfaction** **Sessions #4 and #8**

**1. Please indicate the degree to which you agree or disagree with the statements below:**

|                                                                      | <b>Strongly disagree</b> | <b>Disagree</b> | <b>Neither agree or disagree</b> | <b>Agree</b> | <b>Strongly agree</b> |
|----------------------------------------------------------------------|--------------------------|-----------------|----------------------------------|--------------|-----------------------|
| I feel the facilitators remained respectful and non-judgmental.      | 1                        | 2               | 3                                | 4            | 5                     |
| I feel the facilitators managed communication well within the group. | 1                        | 2               | 3                                | 4            | 5                     |
| I feel the facilitators maintained a safe environment.               | 1                        | 2               | 3                                | 4            | 5                     |

**2. Please read the statements below and circle the number that best indicates your feelings about each statement. For example, if you strongly disagree with a statement, circle “1”. If you are neutral, circle “2”, and if you strongly agree, circle “5”.**

|                                                                                                            | <b>Strongly disagree</b> |   |   |   | <b>Strongly agree</b> |
|------------------------------------------------------------------------------------------------------------|--------------------------|---|---|---|-----------------------|
| Since I started coming to this group, I have begun to have more faith in my ability to change myself.      | 1                        | 2 | 3 | 4 | 5                     |
| Since I started coming to this group, I have begun to cope much better with my life.                       | 1                        | 2 | 3 | 4 | 5                     |
| The group helps me find new coping strategies.                                                             | 1                        | 2 | 3 | 4 | 5                     |
| The group has helped me learn ways of solving my problems.                                                 | 1                        | 2 | 3 | 4 | 5                     |
| The group has helped me find ways of controlling myself.                                                   | 1                        | 2 | 3 | 4 | 5                     |
| The group makes me feel I’m not alone with my difficulties.                                                | 1                        | 2 | 3 | 4 | 5                     |
| The group takes me out of my loneliness.                                                                   | 1                        | 2 | 3 | 4 | 5                     |
| A professional could never understand me the way group members can.                                        | 1                        | 2 | 3 | 4 | 5                     |
| The group helps me evaluate my coping strategies.                                                          | 1                        | 2 | 3 | 4 | 5                     |
| The group makes me feel I can function as well as anyone else.                                             | 1                        | 2 | 3 | 4 | 5                     |
| Other group members’ knowledge and experience helps me as much as the help I could get from professionals. | 1                        | 2 | 3 | 4 | 5                     |
| I share my life experiences with other members of the group.                                               | 1                        | 2 | 3 | 4 | 5                     |

Protocol CTNPT 029 Group Therapy Satisfaction Questionnaire  
Version Date: Version 3.0 - 7-Mar-2018

IN HAND – Group Therapy Satisfaction Questionnaire

ID: \_\_\_\_\_ Date: \_\_\_\_\_

|                                                                                                                                                   |   |   |   |   |   |
|---------------------------------------------------------------------------------------------------------------------------------------------------|---|---|---|---|---|
| I share my troubles with other members of the group.                                                                                              | 1 | 2 | 3 | 4 | 5 |
| Members of the group disclose personal and intimate details of their lives.                                                                       | 1 | 2 | 3 | 4 | 5 |
| The group helps me to release tension.                                                                                                            | 1 | 2 | 3 | 4 | 5 |
| I contribute my own knowledge and experience to the other members.                                                                                | 1 | 2 | 3 | 4 | 5 |
| I help the members of the group a lot through my own knowledge and experience.                                                                    | 1 | 2 | 3 | 4 | 5 |
| The knowledge and experience I acquired as a result of my situation contribute to the group at least the same as the knowledge of a professional. | 1 | 2 | 3 | 4 | 5 |
| When something bothers me, members of the group treat me kindly.                                                                                  | 1 | 2 | 3 | 4 | 5 |
| Group members care about each other.                                                                                                              | 1 | 2 | 3 | 4 | 5 |
| I give group members “tips” on how to cope with daily situations.                                                                                 | 1 | 2 | 3 | 4 | 5 |
| The group offers me “tips” on how to cope with daily situations.                                                                                  | 1 | 2 | 3 | 4 | 5 |

**3. How did you feel about the size of the group?**

☐ Too many people      ☐ Too few people      ☐ Just right

**4. Overall, how did you feel about the length of each group session (3 hours)?**

☐ Too short      ☐ Too long      ☐ Just right  
 a) Any other comments about group size and/or session length?

**5. Is there anything else you would like to tell us about working within a group?**
